# Supplementary material
Source: publisher figshare collection journal article supplement (https://sage.figshare.com/ndownloader/files/15263441)
Supplement: Supplementary file 1 [file 15263441]

*Appendix 1 – Survey of Scottish Liaison Psychiatrists*

**1. Which general hospital(s) do you cover?**

**2. If a patient is detained in the general hospital which you cover, would this patient normally be detained under:**

- a. An EDC
- b. A STDC
- c. A mixture of both

**3. If a patient requires detention in the general hospital which your team covers, who would normally carry this out:**

|                             | In hours | Out of hours |
|-----------------------------|----------|--------------|
| General Hospital Staff      |          |              |
| Psychiatric Staff - AMP     |          |              |
| Psychiatric Staff - non-AMP |          |              |

**4. If psychiatric staff detain the patient in the general hospital, would he/she be detained under a:**

|                   | In hours | Out of hours |
|-------------------|----------|--------------|
| EDC               |          |              |
| STDC              |          |              |
| A mixture of both |          |              |

**5. What happens with the section paperwork once the patient has been detained and is to remain in the general hospital?**

- a. Passed to hospital managers in the general hospital to process
- b. Passed to hospital managers in the psychiatric hospital to process
- c. Passed to the Psychiatric Department within the general hospital to process

**6. How is the paperwork passed to the hospital managers? (please select one or more)**

- a. Taken there by general hospital staff
- b. Taken there by psychiatric staff
- c. Sent in the post
- d. Sent electronically
- e. Other

**7. Which of the following problems have you or your staff encountered in the detention process within the general hospital?**

|                                                                                     | Never | Rarely | Sometimes | Commonly | Very Commonly |
|-------------------------------------------------------------------------------------|-------|--------|-----------|----------|---------------|
| Detention paperwork not completed properly                                          |       |        |           |          |               |
| MHO not contacted                                                                   |       |        |           |          |               |
| MHO not able to attend                                                              |       |        |           |          |               |
| Emergency detention certificate not notified to psychiatric staff                   |       |        |           |          |               |
| Detention papers not passed to hospital managers in a timely manner                 |       |        |           |          |               |
| Patient discharged from hospital prior to revocation or natural expiry of detention |       |        |           |          |               |
| Detention inappropriately 'revoked' by general hospital staff                       |       |        |           |          |               |

**8. Do you provide any written guidance to general hospital staff to help them with the process of detaining a patient in the general hospital?**

- a. Yes

b. No

**9. Do you do any educational sessions for general hospital staff on the use of the Mental Health Act?**

a. Yes

b. No

**10. Survey Completed By**

Name:

Designation:

Department:
